# Supplementary material for: Evidence for the I-Shaped Dimers of a Plant Chloroplast F<sub>O</sub>F<sub>1</sub>-ATP Synthase in Response to Changes in Ionic Strength
Source: Preprints.org preprint supplement (doi:10.20944/preprints202305.0170.v1), 2023-05-04
Supplement: Supplementary file 1 [file supplementary]

## Evidence for the I-shaped dimers of a plant chloroplast $F_oF_1$ -ATP synthase in response to changes in ionic strength

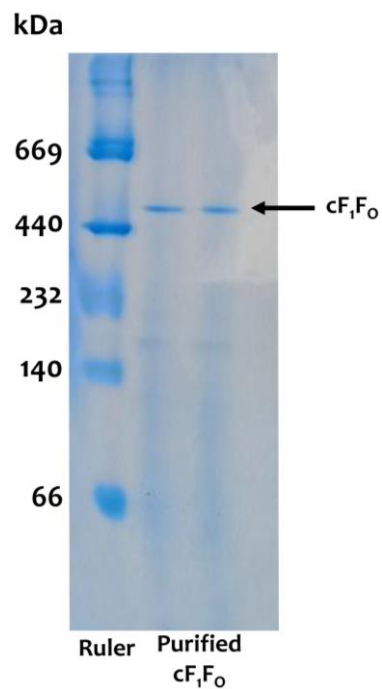

**Figure S1.** Characterization of the purified  $cF_oF_1$  by BN-PAGE (6 – 18 %). MW-ruler: 66, 140, 232, 440, 669 kDa. Purified samples of  $cF_oF_1$  showed the band between 440 and 669 kDa. The expected molecular weight of the  $cF_oF_1$  complex is ~595 kDa.

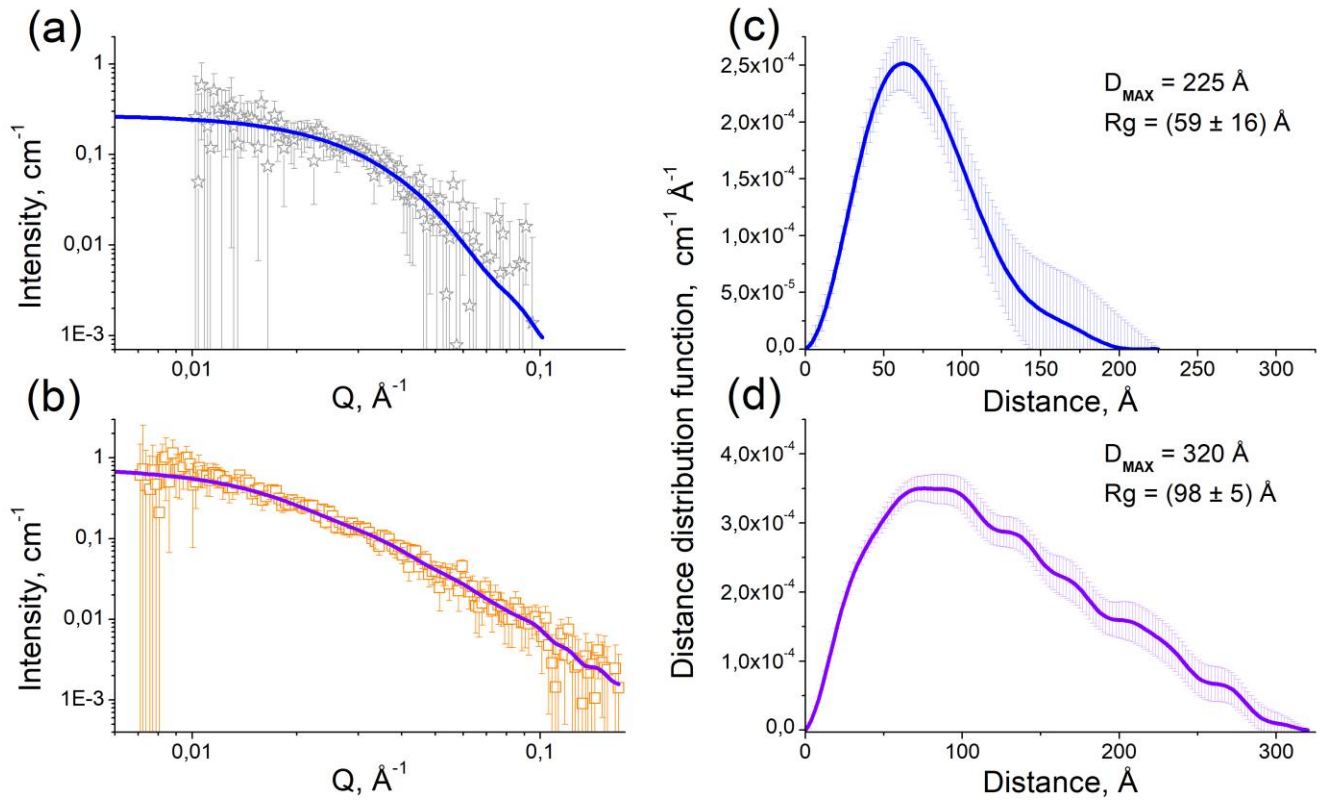

**Figure S2.** SANS characterization of cFoF1: **(a)** SANS experimental data for AEX-purified cFoF1 in H<sub>2</sub>O-buffer (hollow grey stars) and a regularized fit (blue line); **(b)** SANS experimental data for cFoF1 at 300 mM NaCl in 93% D<sub>2</sub>O-buffer (hollow orange squares) and a regularized fit (purple line); **(c)** Pair-distance distribution function  $P(r)$  for cFoF1 in H<sub>2</sub>O-buffer; **(d)** Pair-distance distribution function  $P(r)$  for cFoF1 at 300 mM NaCl in 93% D<sub>2</sub>O-buffer.

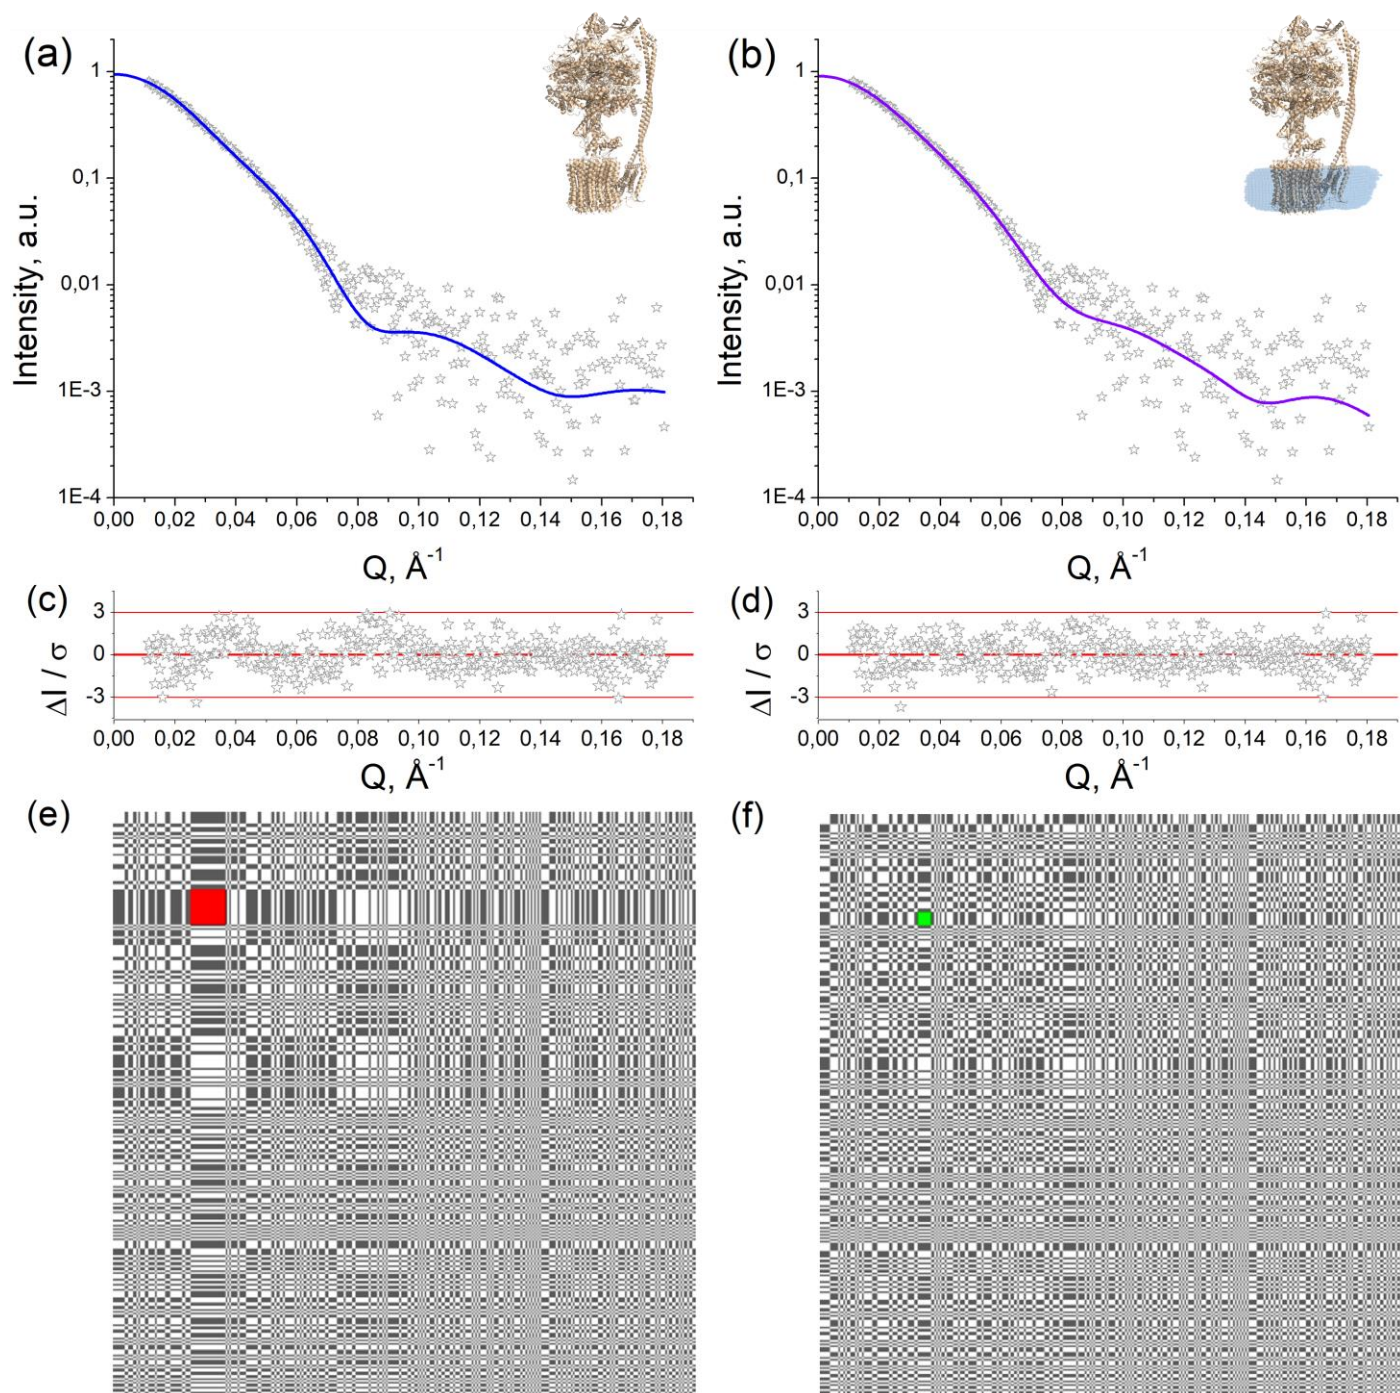

**Figure S3.** Influence of a detergent belt on quality of SAXS data approximation: (a) SAXS experimental data for cFoF<sub>1</sub> (hollow grey stars) and an approximation (blue line,  $\chi^2 = 1.35$ ) obtained by CRY SOL for the model of cFoF<sub>1</sub> without a detergent belt (PDB ID: 6FKF); (b) SAXS experimental data for cFoF<sub>1</sub> the same as in panel (a) (hollow grey stars) and an approximation (blue line,  $\chi^2 = 1.15$ ) obtained by CRY SOL for model of protein with detergent belt built by MEMPROT; (c) Relative residues of the fit shown in panel (a); (d) Relative residues of the fit shown in panel (b); (e) Correlation map (P-value 0.000156) for the fit shown in panel (a); (f) Correlation map (P-value 0.745484) for the fit shown in panel (b).



(a)

| #<br>model | HDOCK            |                     | PDBePISA                          |                          |          |          | $D_{m-m}$ ,<br>Å | SAXS data approximation for cF <sub>o</sub> F <sub>1</sub> |                                             |                                             |                                             |                                             |
|------------|------------------|---------------------|-----------------------------------|--------------------------|----------|----------|------------------|------------------------------------------------------------|---------------------------------------------|---------------------------------------------|---------------------------------------------|---------------------------------------------|
|            | Docking<br>score | Confidence<br>score | interface<br>area, Å <sup>2</sup> | $\Delta G$ ,<br>kcal/mol | $N_{HB}$ | $N_{SB}$ |                  | 150 mM<br>NaCl                                             | 250 mM<br>NaCl                              | 300 mM<br>NaCl                              | 350 mM<br>NaCl                              | 450 mM<br>NaCl                              |
| 1          | -154.82          | 0.5241              | 1910,5                            | -0,3                     | 13       | 7        | 168              | $\chi^2 = 1.41$<br>$\alpha_2 = 65 \pm 2 \%$                | $\chi^2 = 1.13$<br>$\alpha_2 = 18 \pm 2 \%$ | $\chi^2 = 1.22$<br>$\alpha_2 = 39 \pm 2 \%$ | $\chi^2 = 1.07$<br>$\alpha_2 = 30 \pm 2 \%$ | $\chi^2 = 1.34$<br>$\alpha_2 = 60 \pm 2 \%$ |
| 2          | -152.11          | 0.5105              | 1046,9                            | 1,7                      | 6        | 6        | 159              | $\chi^2 = 1.41$<br>$\alpha_2 = 62 \pm 2 \%$                | $\chi^2 = 1.13$<br>$\alpha_2 = 17 \pm 2 \%$ | $\chi^2 = 1.23$<br>$\alpha_2 = 37 \pm 2 \%$ | $\chi^2 = 1.07$<br>$\alpha_2 = 28 \pm 2 \%$ | $\chi^2 = 1.34$<br>$\alpha_2 = 57 \pm 2 \%$ |
| 3          | -141.80          | 0.4591              | 1888,2                            | 0,6                      | 13       | 5        | 166              | $\chi^2 = 1.42$<br>$\alpha_2 = 64 \pm 2 \%$                | $\chi^2 = 1.13$<br>$\alpha_2 = 18 \pm 2 \%$ | $\chi^2 = 1.22$<br>$\alpha_2 = 39 \pm 2 \%$ | $\chi^2 = 1.08$<br>$\alpha_2 = 29 \pm 2 \%$ | $\chi^2 = 1.35$<br>$\alpha_2 = 59 \pm 2 \%$ |
| 4          | -139.19          | 0.4462              | 1776,5                            | -4,3                     | 10       | 6        | 203              | $\chi^2 = 1.29$<br>$\alpha_2 = 73 \pm 2 \%$                | $\chi^2 = 1.11$<br>$\alpha_2 = 21 \pm 2 \%$ | $\chi^2 = 1.25$<br>$\alpha_2 = 43 \pm 2 \%$ | $\chi^2 = 1.00$<br>$\alpha_2 = 35 \pm 2 \%$ | $\chi^2 = 1.20$<br>$\alpha_2 = 68 \pm 2 \%$ |
| 5          | -139.18          | 0.4461              | 1218,3                            | 4,8                      | 17       | 4        | 206              | $\chi^2 = 1.26$<br>$\alpha_2 = 77 \pm 2 \%$                | $\chi^2 = 1.10$<br>$\alpha_2 = 23 \pm 2 \%$ | $\chi^2 = 1.28$<br>$\alpha_2 = 44 \pm 3 \%$ | $\chi^2 = 0.96$<br>$\alpha_2 = 38 \pm 2 \%$ | $\chi^2 = 1.17$<br>$\alpha_2 = 71 \pm 2 \%$ |
| 6          | -138.84          | 0.4444              | 1225,8                            | 4,2                      | 13       | 3        | 207              | $\chi^2 = 1.26$<br>$\alpha_2 = 77 \pm 2 \%$                | $\chi^2 = 1.10$<br>$\alpha_2 = 23 \pm 2 \%$ | $\chi^2 = 1.28$<br>$\alpha_2 = 44 \pm 3 \%$ | $\chi^2 = 0.95$<br>$\alpha_2 = 38 \pm 2 \%$ | $\chi^2 = 1.17$<br>$\alpha_2 = 71 \pm 2 \%$ |
| 7          | -137.62          | 0.4384              | 1347,6                            | 2                        | 9        | 8        | 206              | $\chi^2 = 1.25$<br>$\alpha_2 = 76 \pm 2 \%$                | $\chi^2 = 1.10$<br>$\alpha_2 = 23 \pm 2 \%$ | $\chi^2 = 1.27$<br>$\alpha_2 = 44 \pm 3 \%$ | $\chi^2 = 0.96$<br>$\alpha_2 = 37 \pm 2 \%$ | $\chi^2 = 1.16$<br>$\alpha_2 = 71 \pm 2 \%$ |
| 8          | -131.93          | 0.4106              | 1033,1                            | -4,1                     | 8        | 0        | 194              | $\chi^2 = 1.25$<br>$\alpha_2 = 75 \pm 2 \%$                | $\chi^2 = 1.09$<br>$\alpha_2 = 23 \pm 2 \%$ | $\chi^2 = 1.27$<br>$\alpha_2 = 44 \pm 3 \%$ | $\chi^2 = 0.96$<br>$\alpha_2 = 37 \pm 2 \%$ | $\chi^2 = 1.16$<br>$\alpha_2 = 70 \pm 2 \%$ |
| 9          | -129.08          | 0.3969              | 1219,3                            | -0,8                     | 10       | 6        | 209              | $\chi^2 = 1.28$<br>$\alpha_2 = 75 \pm 2 \%$                | $\chi^2 = 1.10$<br>$\alpha_2 = 22 \pm 2 \%$ | $\chi^2 = 1.27$<br>$\alpha_2 = 44 \pm 3 \%$ | $\chi^2 = 0.98$<br>$\alpha_2 = 36 \pm 2 \%$ | $\chi^2 = 1.19$<br>$\alpha_2 = 70 \pm 2 \%$ |
| 10         | -127.96          | 0.3916              | 1033,9                            | 2,3                      | 9        | 5        | 151              | $\chi^2 = 1.36$<br>$\alpha_2 = 62 \pm 2 \%$                | $\chi^2 = 1.12$<br>$\alpha_2 = 17 \pm 2 \%$ | $\chi^2 = 1.24$<br>$\alpha_2 = 36 \pm 2 \%$ | $\chi^2 = 1.05$<br>$\alpha_2 = 28 \pm 2 \%$ | $\chi^2 = 1.29$<br>$\alpha_2 = 57 \pm 2 \%$ |

(b)

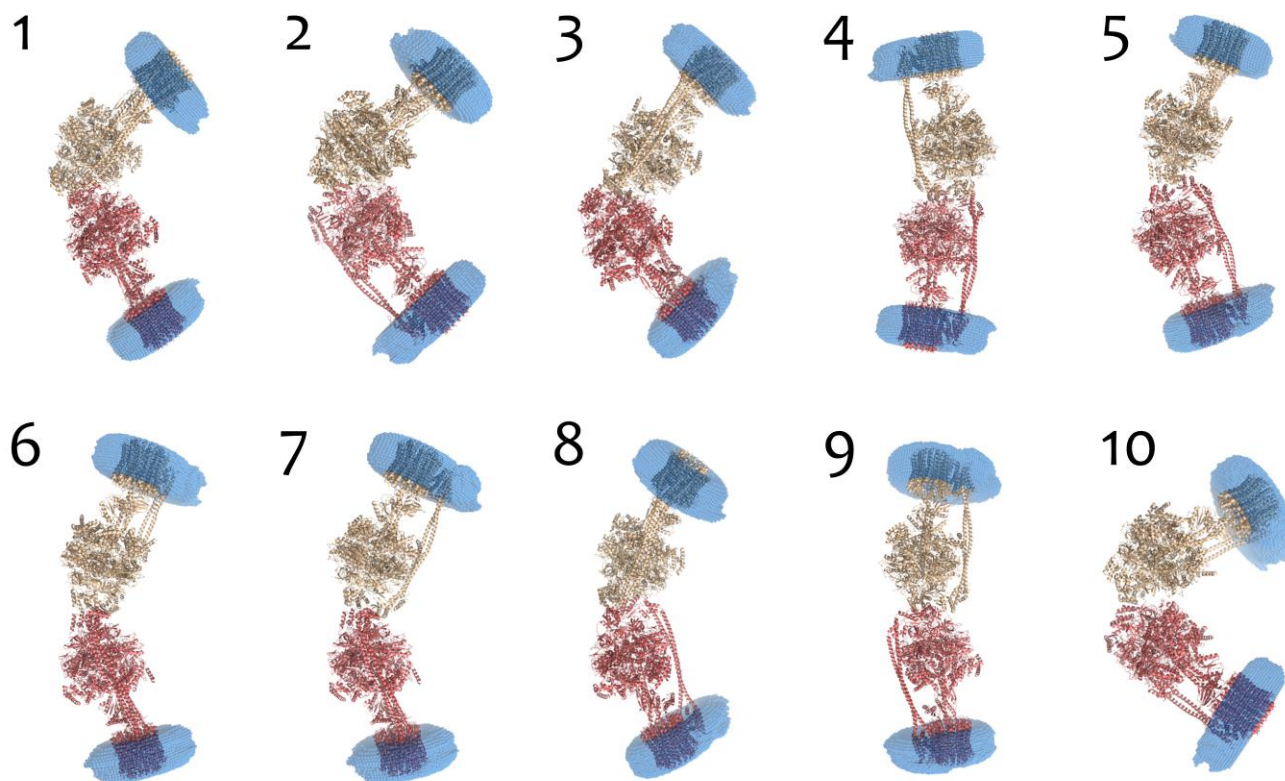

**Figure S4.** Models of F<sub>1</sub>/F<sub>1</sub>-interface dimers of cF<sub>o</sub>F<sub>1</sub> based on the top 10 HDOCK predictions: (a) Table of scoring parameters and SAXS data treatment parameters obtained for the top 10 HDOCK predictions (see

---

section *Macromolecular docking* in Materials and Methods). Table columns are: internal HDock docking quality estimations (Docking score and Confidence score), parameters of macromolecular interfaces estimated using the PDBePISA web-server (interface area, Gibbs energy  $\Delta G$ , numbers of hydrogen bonds  $N(\text{HB})$  and salt bridges  $N(\text{SB})$ ), distances  $D_{\text{m-m}}$  between centers of mass of monomers in the dimers of cF<sub>0</sub>F<sub>1</sub>, and parameters of approximations of SAXS data obtained at 150, 250, 300, 350, and 450 mM NaCl ( $\chi^2$  values and volume fractions of dimers  $\alpha_2$  obtained by the fit in program OLIGOMER); **(b)** Representations of cF<sub>0</sub>F<sub>1</sub> dimers based on the top 10 HDock predictions. The models contain detergent belts obtained by the program MEMPROT.

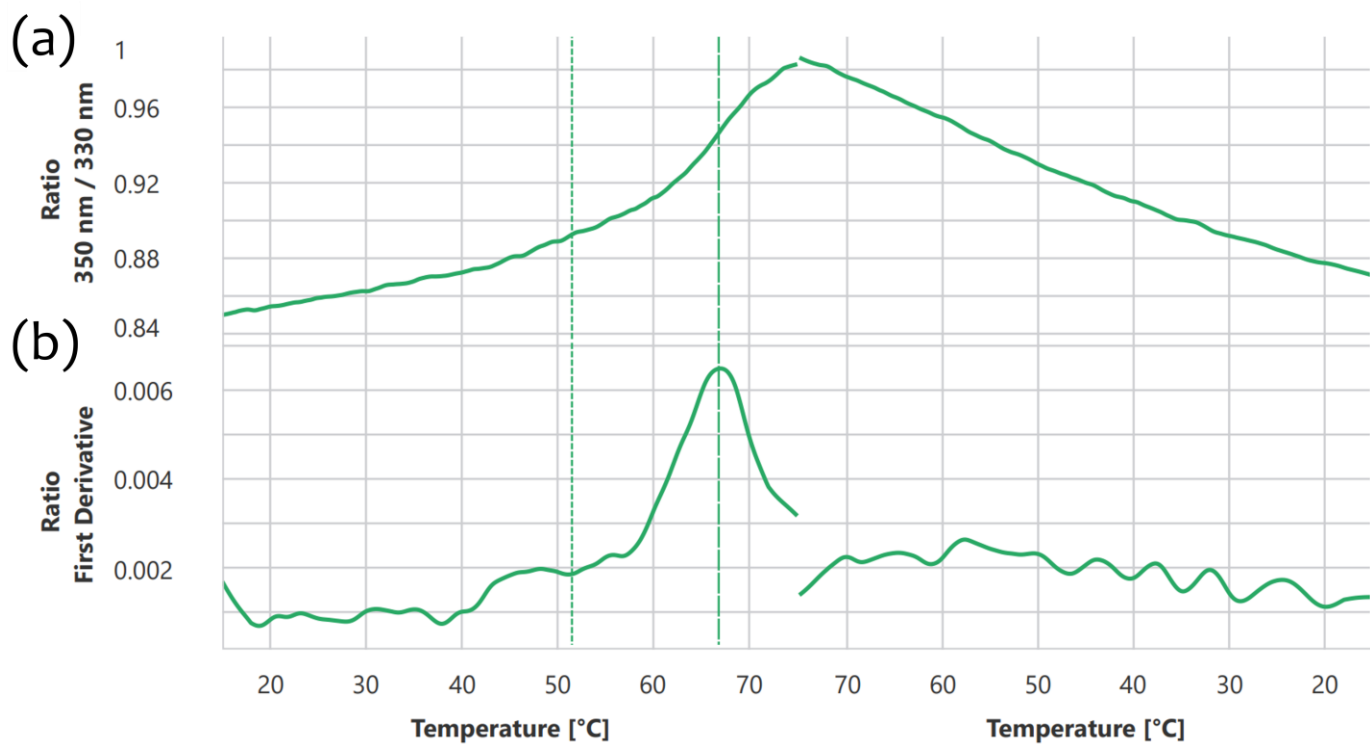

**Figure S5.** Thermal unfolding and refolding graphs measured by nanoDSF method. Vertical short dash line corresponds to  $T_{onset}$ , dash line shows melting temperature  $T_m$ : **(a)** Ratio of fluorescence intensity at 330 nm and 350 nm for temperature range from 15 °C to 75 °C; **(b)** First derivative of the 330 nm/350 nm fluorescence intensity ratio.

**Table S1.** SAXS experimental details and data evaluation summary.

| (a) Sample details <sup>1</sup>                                           |                                                                                                                                                                                                                                                                                                                                                          |                                                                                                                                                            |                     |                     |                     |                     |                 |
|---------------------------------------------------------------------------|----------------------------------------------------------------------------------------------------------------------------------------------------------------------------------------------------------------------------------------------------------------------------------------------------------------------------------------------------------|------------------------------------------------------------------------------------------------------------------------------------------------------------|---------------------|---------------------|---------------------|---------------------|-----------------|
|                                                                           | ATPs AEX                                                                                                                                                                                                                                                                                                                                                 | ATPs<br>150 mM NaCl                                                                                                                                        | ATPs<br>250 mM NaCl | ATPs<br>300 mM NaCl | ATPs<br>350 mM NaCl | ATPs<br>450 mM NaCl |                 |
| Description of sequence                                                   | ATP synthase complex from <i>Spinacia Oleracea</i> (full structure: 6FKF), one complex contains: 3 $\alpha$ (UniProt ID P06450), 3 $\beta$ (UniProt ID P00825), $\gamma$ (UniProt ID P05435), delta (UniProt ID P11402), $\epsilon$ (UniProt ID P00833), a (UniProt ID P06451), b (UniProt ID P06453), b' (UniProt ID P31853), 14 c (UniProt ID P69447). |                                                                                                                                                            |                     |                     |                     |                     |                 |
| $\epsilon_{280}$ (M <sup>-1</sup> cm <sup>-1</sup> )                      | $\alpha$ : 26820, $\beta$ : 17880, $\gamma$ : 10430, $\delta$ : 5960, $\epsilon$ : 11000, a: 42400, b: 9970, b': 4470, c: 1490, full complex: 196 790                                                                                                                                                                                                    |                                                                                                                                                            |                     |                     |                     |                     |                 |
| Partial specific volume                                                   | 0.7286 cm <sup>3</sup> /g                                                                                                                                                                                                                                                                                                                                |                                                                                                                                                            |                     |                     |                     |                     |                 |
| Complex volume                                                            | 722670 Å <sup>3</sup>                                                                                                                                                                                                                                                                                                                                    |                                                                                                                                                            |                     |                     |                     |                     |                 |
| Molecular mass                                                            | 597.24 kDa                                                                                                                                                                                                                                                                                                                                               |                                                                                                                                                            |                     |                     |                     |                     |                 |
| Sample concentration                                                      | 5.0 mg/ml                                                                                                                                                                                                                                                                                                                                                |                                                                                                                                                            |                     |                     |                     |                     |                 |
| Solvent composition                                                       | 30 mM HEPES (pH 8.0), 2 mM MgCl <sub>2</sub> , 0.04% <i>tpcc</i> - $\alpha$ -M,<br>~300 mM NaCl    150 mM NaCl,    250 mM NaCl,    300 mM NaCl,    350 mM NaCl,    450 mM NaCl,                                                                                                                                                                          |                                                                                                                                                            |                     |                     |                     |                     |                 |
| (b) SAS data collection parameters                                        |                                                                                                                                                                                                                                                                                                                                                          |                                                                                                                                                            |                     |                     |                     |                     |                 |
| Instrument                                                                | Rigaku MicroMax-007 HF (MIPT, Dolgoprudny, Russia)                                                                                                                                                                                                                                                                                                       |                                                                                                                                                            |                     |                     |                     |                     |                 |
| Wavelength                                                                | 1.5406 Å                                                                                                                                                                                                                                                                                                                                                 |                                                                                                                                                            |                     |                     |                     |                     |                 |
| Beam geometry                                                             | Size (FWHM beam diameter at sample position): 0.3 mm; Sample-to-detector distance: 2.0 m                                                                                                                                                                                                                                                                 |                                                                                                                                                            |                     |                     |                     |                     |                 |
| Sample configuration                                                      | Glass capillaries with diameters of ~1.5 mm                                                                                                                                                                                                                                                                                                              |                                                                                                                                                            |                     |                     |                     |                     |                 |
| Q-measurement range                                                       | 0.007 – 0.215 Å <sup>-1</sup>                                                                                                                                                                                                                                                                                                                            |                                                                                                                                                            |                     |                     |                     |                     |                 |
| Q-scaling method                                                          | Calibration standard: silver behenate powder                                                                                                                                                                                                                                                                                                             |                                                                                                                                                            |                     |                     |                     |                     |                 |
| Exposure time                                                             | 5400 sec for each sample                                                                                                                                                                                                                                                                                                                                 |                                                                                                                                                            |                     |                     |                     |                     |                 |
| Sample temperature                                                        | 20 °C                                                                                                                                                                                                                                                                                                                                                    |                                                                                                                                                            |                     |                     |                     |                     |                 |
| (c) Software employed for SAS data reduction, analysis and interpretation |                                                                                                                                                                                                                                                                                                                                                          |                                                                                                                                                            |                     |                     |                     |                     |                 |
| Data averaging and subtraction, Guinier analysis                          |                                                                                                                                                                                                                                                                                                                                                          | PRIMUSqt from ATSAS                                                                                                                                        |                     |                     |                     |                     |                 |
| Calculation of $\epsilon$ from sequence                                   |                                                                                                                                                                                                                                                                                                                                                          | ProtParam: <a href="https://web.expasy.org/protparam/">https://web.expasy.org/protparam/</a>                                                               |                     |                     |                     |                     |                 |
| Calculation of volume from chemical composition                           |                                                                                                                                                                                                                                                                                                                                                          | Peptide Property Calculator: <a href="http://biotools.nubic.northwestern.edu/proteincalc.html">http://biotools.nubic.northwestern.edu/proteincalc.html</a> |                     |                     |                     |                     |                 |
| $P(r)$ analysis                                                           |                                                                                                                                                                                                                                                                                                                                                          | GNOM from ATSAS                                                                                                                                            |                     |                     |                     |                     |                 |
| Atomic structure modelling                                                |                                                                                                                                                                                                                                                                                                                                                          | HDock web-server; MEMPROT 2.2; CRY SOL 2.0 (command line mode)                                                                                             |                     |                     |                     |                     |                 |
| Molecular graphics                                                        |                                                                                                                                                                                                                                                                                                                                                          | PyMOL 1.9.x                                                                                                                                                |                     |                     |                     |                     |                 |
| (d) Structural parameters                                                 |                                                                                                                                                                                                                                                                                                                                                          |                                                                                                                                                            |                     |                     |                     |                     |                 |
|                                                                           | ATPs AEX                                                                                                                                                                                                                                                                                                                                                 | ATPs<br>150 mM NaCl                                                                                                                                        | ATPs<br>250 mM NaCl | ATPs<br>300 mM NaCl | ATPs<br>350 mM NaCl | ATPs<br>450 mM NaCl |                 |
| $P(r)$ analysis                                                           | I(0) (a.u.)                                                                                                                                                                                                                                                                                                                                              | 1.03 ± 0.02                                                                                                                                                | 1.35 ± 0.04         | 1.00 ± 0.03         | 1.02 ± 0.03         | 1.39 ± 0.05         | 1.66 ± 0.06     |
|                                                                           | R <sub>g</sub> (Å)                                                                                                                                                                                                                                                                                                                                       | 76.5 ± 2.2                                                                                                                                                 | 104.7 ± 5.0         | 82.5 ± 3.7          | 90.3 ± 5.1          | 110.3 ± 7.8         | 129.9 ± 5.4     |
|                                                                           | D <sub>max</sub> (Å)                                                                                                                                                                                                                                                                                                                                     | 285.0                                                                                                                                                      | 402.16              | 333.5               | 382.0               | 453.0               | 465.0           |
|                                                                           | Q-range (Å <sup>-1</sup> )                                                                                                                                                                                                                                                                                                                               | 0.0085 – 0.1355                                                                                                                                            | 0.0065 – 0.1355     | 0.0065 – 0.1355     | 0.0065 – 0.1355     | 0.0065 – 0.1355     | 0.0065 – 0.1355 |
|                                                                           | Q <sub>min</sub> D <sub>max</sub> / $\pi$                                                                                                                                                                                                                                                                                                                | 0.77                                                                                                                                                       | 0.83                | 0.69                | 0,79                | 0.93                | 0.96            |
|                                                                           | Total quality estimate (GNOM)                                                                                                                                                                                                                                                                                                                            | 0.6756                                                                                                                                                     | 0.6556              | 0.6460              | 0.5497              | 0.6647              | 0.6468          |

|                  |                          |             |             |             |             |             |             |
|------------------|--------------------------|-------------|-------------|-------------|-------------|-------------|-------------|
| Guinier analysis | I(0) (a.u.)              | 1.05 ± 0.03 | 1.33 ± 0.03 | 0.97 ± 0.02 | 0.97 ± 0.03 | 1.30 ± 0.03 | 1.54 ± 0.07 |
|                  | R <sub>g</sub> (Å)       | 75.9 ± 3.0  | 96.0 ± 2.9  | 73.7 ± 1.7  | 78.3 ± 3.1  | 88.7 ± 2.8  | 107.7 ± 6.8 |
|                  | Q R <sub>g</sub> – range | 0.64 – 1.29 | 0.72 – 1.30 | 0.48 – 1.29 | 0.51 – 1.29 | 0.58 – 1.29 | 0.70 – 1.29 |

**(e) Atomistic modelling**

|                                                 | <i>ATPs AEX</i>                                                                                                                                                                                                                                                                                                                                                                                                                                                                                                 | <i>ATPs</i><br><i>150 mM NaCl</i> | <i>ATPs</i><br><i>250 mM NaCl</i> | <i>ATPs</i><br><i>300 mM NaCl</i> | <i>ATPs</i><br><i>350 mM NaCl</i> | <i>ATPs</i><br><i>450 mM NaCl</i> |
|-------------------------------------------------|-----------------------------------------------------------------------------------------------------------------------------------------------------------------------------------------------------------------------------------------------------------------------------------------------------------------------------------------------------------------------------------------------------------------------------------------------------------------------------------------------------------------|-----------------------------------|-----------------------------------|-----------------------------------|-----------------------------------|-----------------------------------|
| Q-range (Å <sup>-1</sup> )                      | 0.011 – 0.1805                                                                                                                                                                                                                                                                                                                                                                                                                                                                                                  | 0.0075 – 0.1805                   | 0.0070 – 0.1805                   | 0.0065 – 0.1805                   | 0.0065 – 0.1805                   | 0.0065 – 0.1805                   |
| <b>Method</b>                                   | CRY SOL 2.0 (command line mode)                                                                                                                                                                                                                                                                                                                                                                                                                                                                                 |                                   |                                   |                                   |                                   |                                   |
| Any measures of model precision                 | Protein model (PDB ID: 6FKF) without detergent belt                                                                                                                                                                                                                                                                                                                                                                                                                                                             |                                   |                                   |                                   |                                   |                                   |
| Solvation shell Δq                              | 0.020 e / Å <sup>3</sup>                                                                                                                                                                                                                                                                                                                                                                                                                                                                                        |                                   |                                   |                                   |                                   |                                   |
| R <sub>a</sub>                                  | 1.640 Å                                                                                                                                                                                                                                                                                                                                                                                                                                                                                                         |                                   |                                   |                                   |                                   |                                   |
| Volume                                          | 757369 Å <sup>3</sup>                                                                                                                                                                                                                                                                                                                                                                                                                                                                                           |                                   |                                   |                                   |                                   |                                   |
| χ <sup>2</sup> value                            | 1.347                                                                                                                                                                                                                                                                                                                                                                                                                                                                                                           |                                   |                                   |                                   |                                   |                                   |
| <b>Method</b>                                   | MEMPROT; CRY SOL 2.0 (command line mode)                                                                                                                                                                                                                                                                                                                                                                                                                                                                        |                                   |                                   |                                   |                                   |                                   |
| Any measures of model precision                 | Protein model (PDB ID: 6FKF) with pseudo-atomic detergent belt obtained using MEMPROT. Parameters of the detergent belt: adaptive shape algorithm type 2 (MBJP), a = 32.4 Å, b = 7.0 Å, t = 6.5 Å, e = 1.0, #mol = 517.                                                                                                                                                                                                                                                                                         |                                   |                                   |                                   |                                   |                                   |
| Solvation shell Δq                              | 0.075 e / Å <sup>3</sup>                                                                                                                                                                                                                                                                                                                                                                                                                                                                                        |                                   |                                   |                                   |                                   |                                   |
| R <sub>a</sub>                                  | 1.400 Å                                                                                                                                                                                                                                                                                                                                                                                                                                                                                                         |                                   |                                   |                                   |                                   |                                   |
| Volume                                          | 980265 Å <sup>3</sup>                                                                                                                                                                                                                                                                                                                                                                                                                                                                                           |                                   |                                   |                                   |                                   |                                   |
| χ <sup>2</sup> value                            | 1.149                                                                                                                                                                                                                                                                                                                                                                                                                                                                                                           |                                   |                                   |                                   |                                   |                                   |
| <b>Method</b>                                   | OLIGOMER                                                                                                                                                                                                                                                                                                                                                                                                                                                                                                        |                                   |                                   |                                   |                                   |                                   |
| Any measures of model precision                 | Experimental data were fitted by a set of curves calculated using CRY SOL 2.0 (command line mode) for monomers and dimers of cFoF <sub>1</sub> . Calculations of a set of form-factors were performed for the models of monomeric and dimeric cFoF <sub>1</sub> containing detergent belts obtained by MEMPROT using the optimal parameters of the monomeric fit obtained for the AEX-purified protein: R <sub>a</sub> = 1.4 Å, Δq(shell) = 0.075 e / Å <sup>3</sup> , monomer volume = 980265 Å <sup>3</sup> . |                                   |                                   |                                   |                                   |                                   |
| Volume fraction of the cFoF <sub>1</sub> dimers |                                                                                                                                                                                                                                                                                                                                                                                                                                                                                                                 | 0.733 ± 0.022                     | 0.214 ± 0.022                     | 0.431 ± 0.024                     | 0.350 ± 0.020                     | 0.680 ± 0.020                     |
| χ <sup>2</sup> value                            |                                                                                                                                                                                                                                                                                                                                                                                                                                                                                                                 | 1.29                              | 1.11                              | 1.25                              | 1.00                              | 1.20                              |

**(f) Data and model deposition IDs \***

|  | <i>ATPs AEX</i>             | <i>ATPs</i><br><i>150 mM NaCl</i> | <i>ATPs</i><br><i>250 mM NaCl</i> | <i>ATPs</i><br><i>300 mM NaCl</i> | <i>ATPs</i><br><i>350 mM NaCl</i> | <i>ATPs</i><br><i>450 mM NaCl</i> |
|--|-----------------------------|-----------------------------------|-----------------------------------|-----------------------------------|-----------------------------------|-----------------------------------|
|  | SASxxxx<br>(draft ID: 4860) | SASxxxx<br>(draft ID: 4861)       | SASxxxx<br>(draft ID: 4862)       | SASxxxx<br>(draft ID: 4863)       | SASxxxx<br>(draft ID: 4864)       | SASxxxx<br>(draft ID: 4865)       |

<sup>1</sup>These values were calculated from the protein sequence without taking into account possible ligands (ADP, ATP, etc.) or detergent molecules.
